# Supplementary material
Source: Springer Nature journal article supplement (https://www.springermedizin.de/resource/supplementary/12936_2014_3366_MOESM4_ESM.pdf/9545740)
Supplement: MOESM4 [file 9545740]

Additional file 4: Differences of expression in pathways due to cepharanthine.

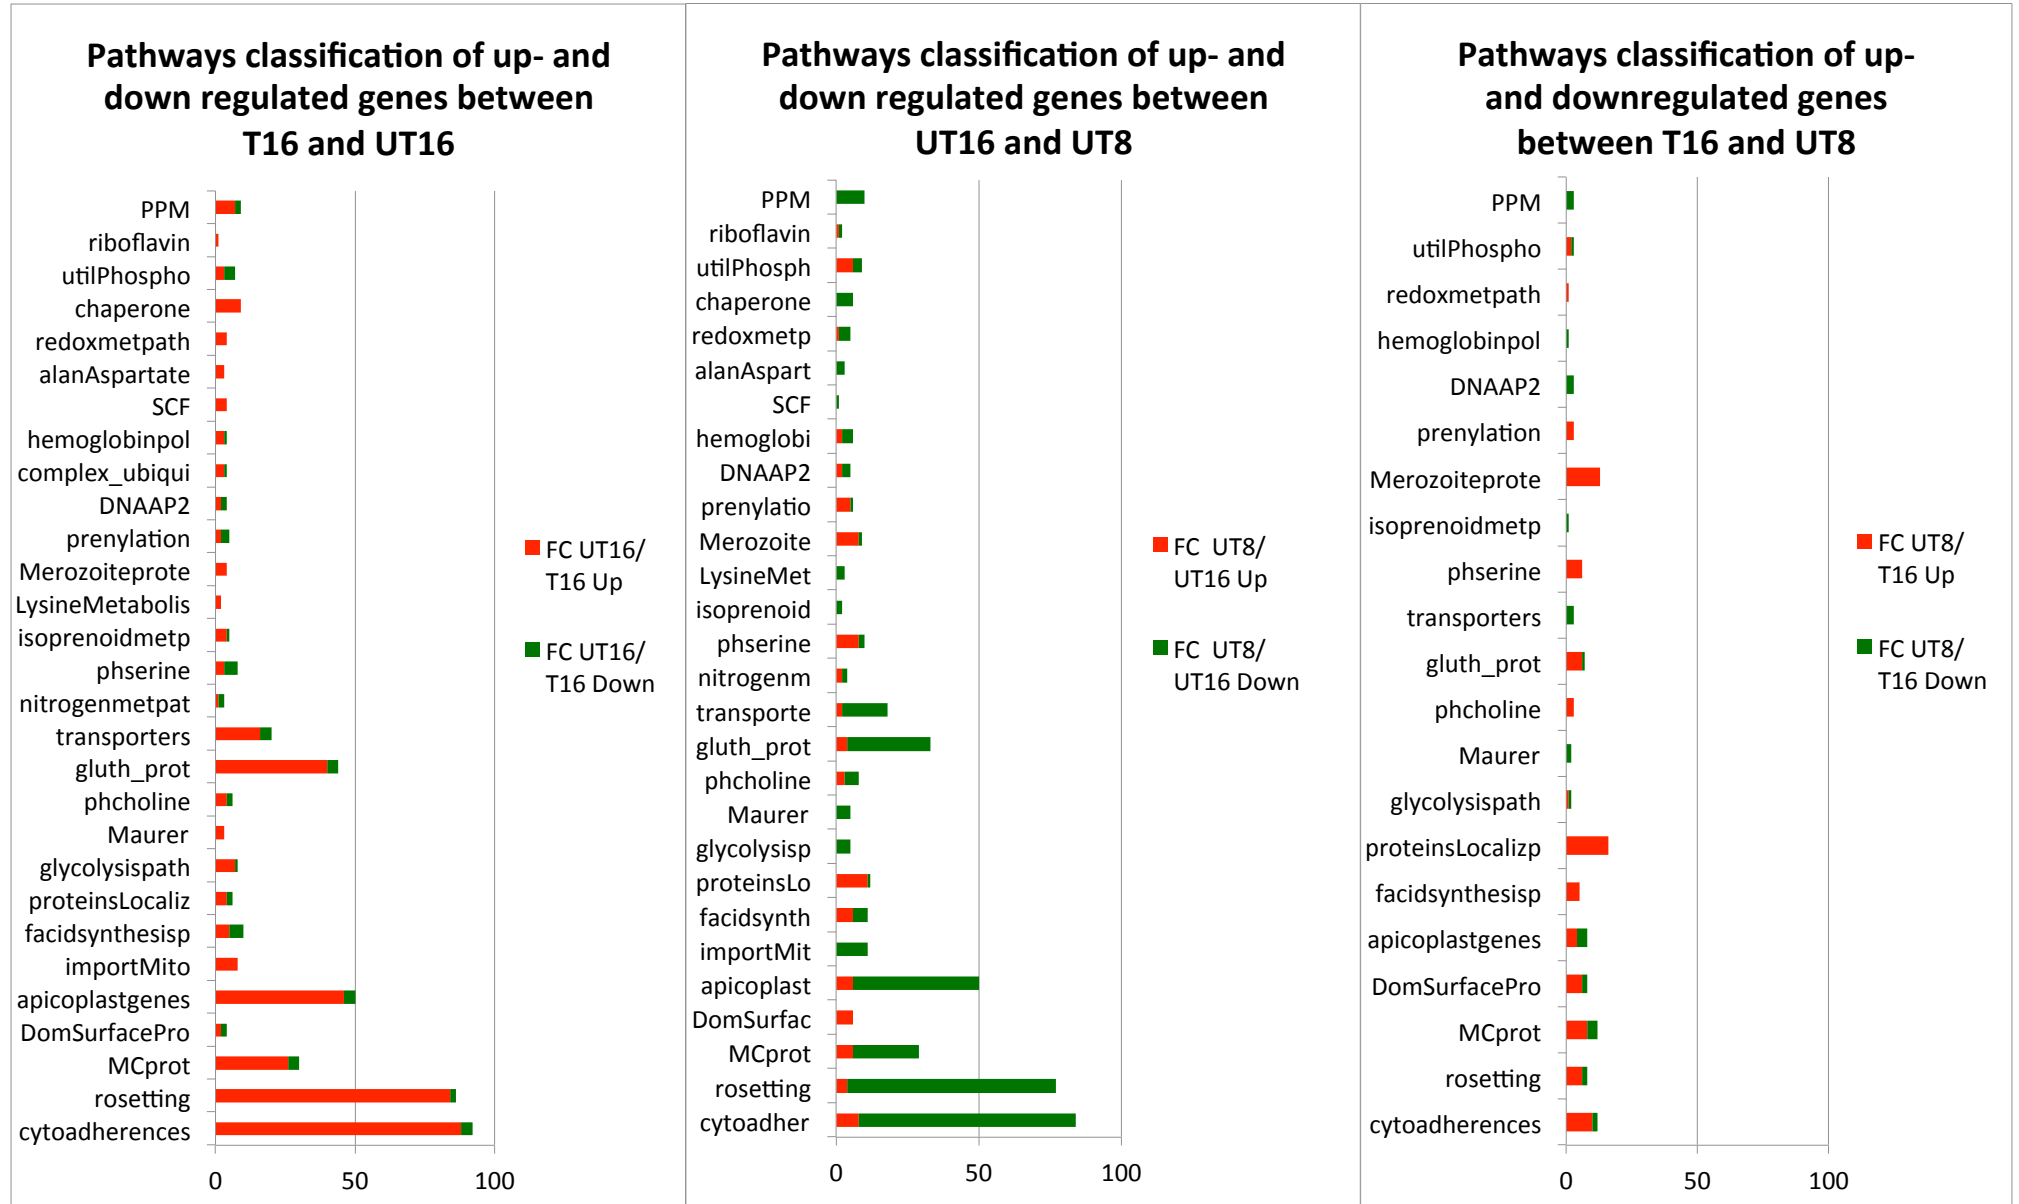

These three histograms compare the expression of pathways by pairs of experimental conditions. Horizontal bars lengths correspond to the number of genes up-regulated (red) and down-regulated (green) from each metabolic pathway. FC = foldchange, UT = untreated, T = treated.
